# Supplementary material for: Intravitreal Administration Effect of Adipose-Derived Mesenchymal Stromal Cells Combined with Anti-VEGF Nanocarriers, in a Pharmaceutically Induced Animal Model of Retinal Vein Occlusion
Source: Hindawi journal article supplement (doi:10.1155/2022/2760147), 2022-02-23

**A**

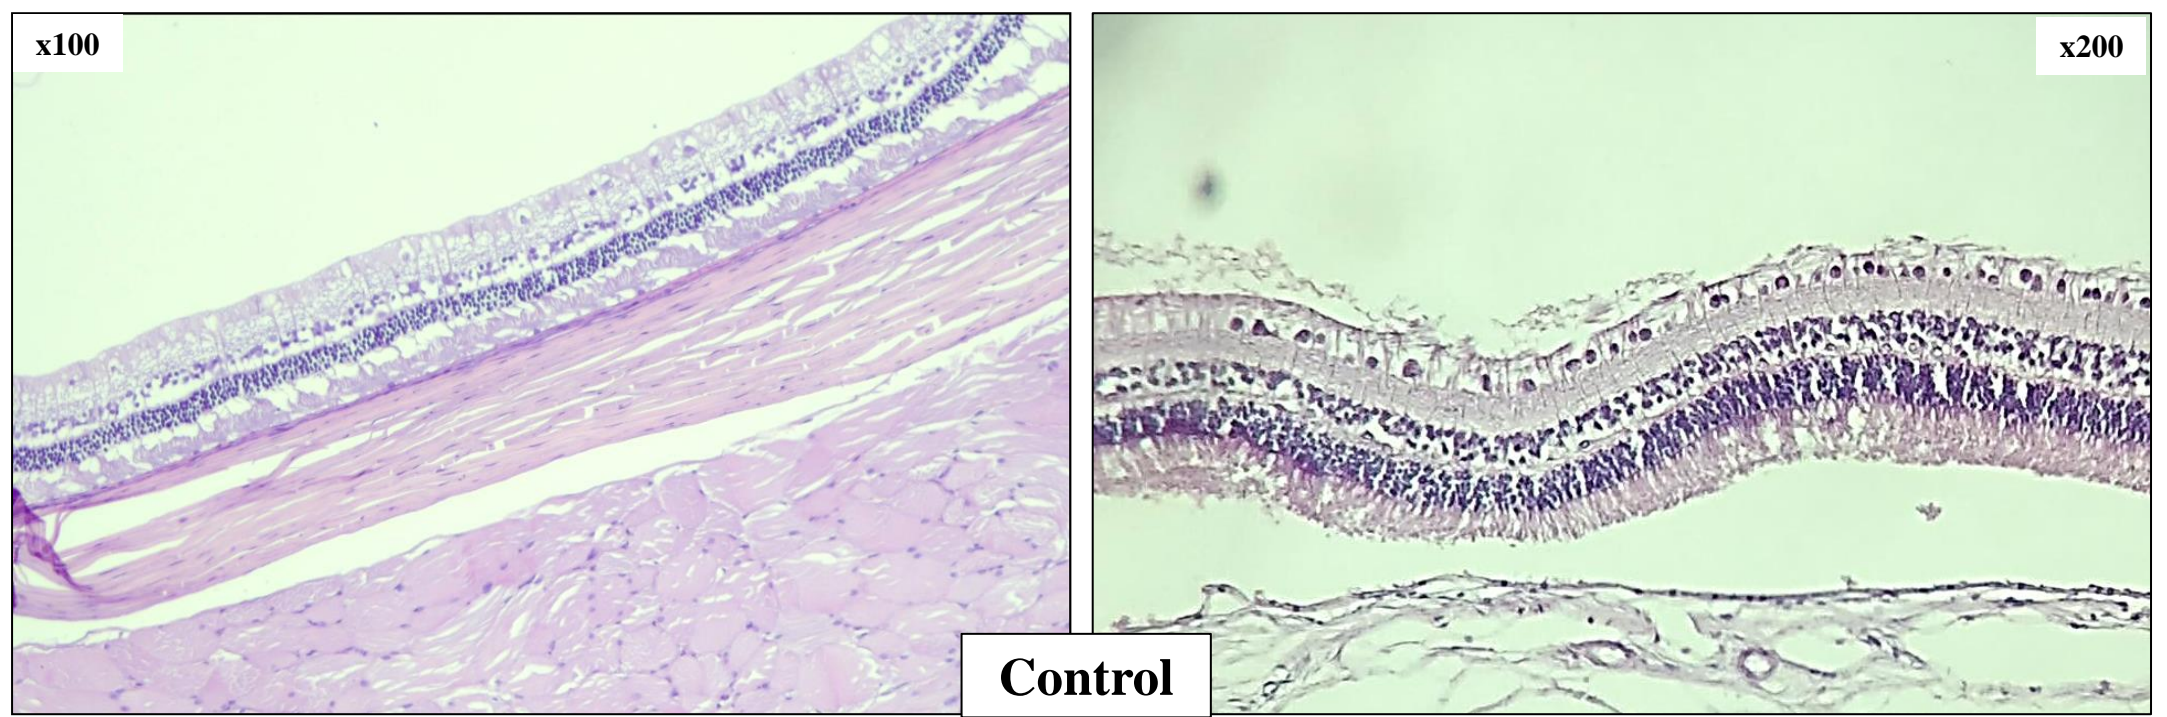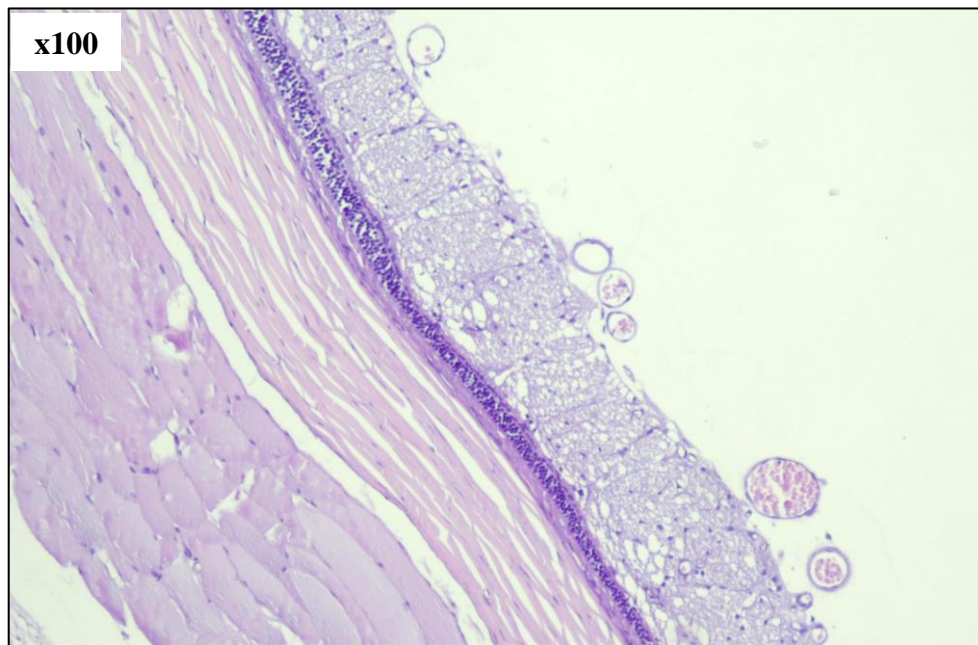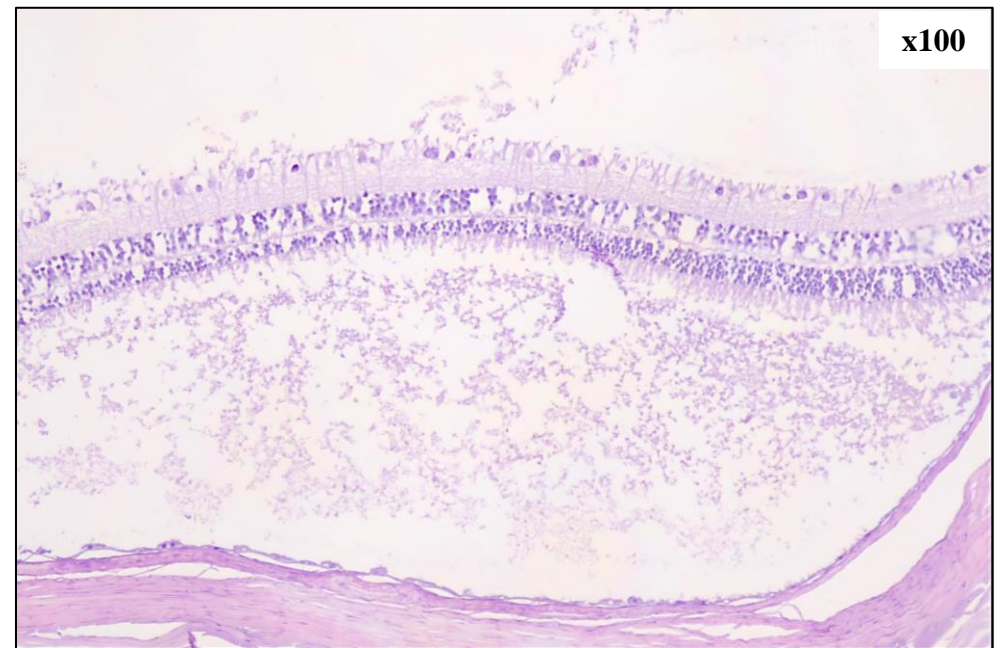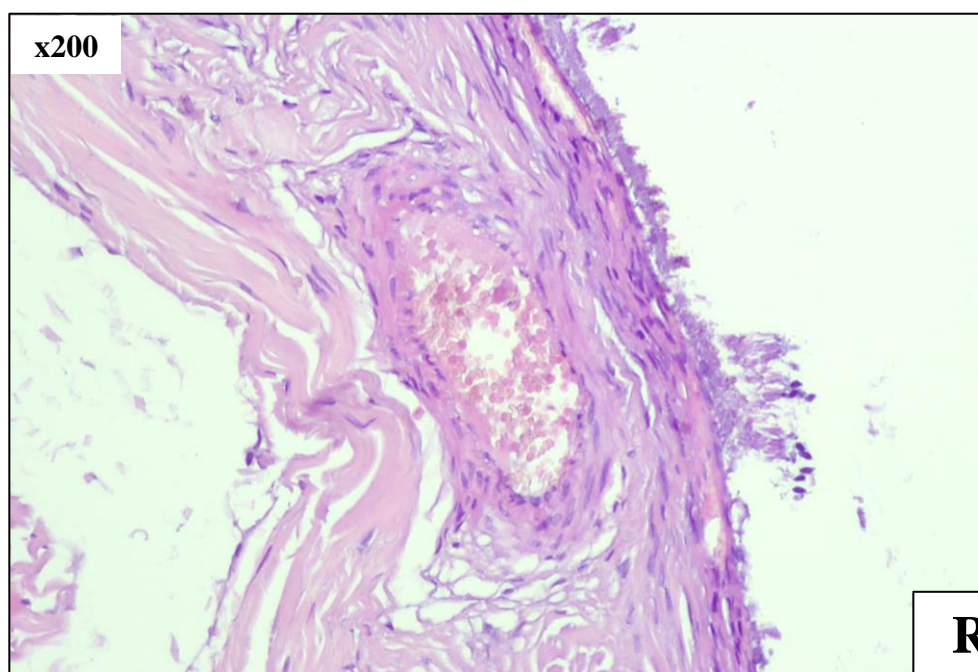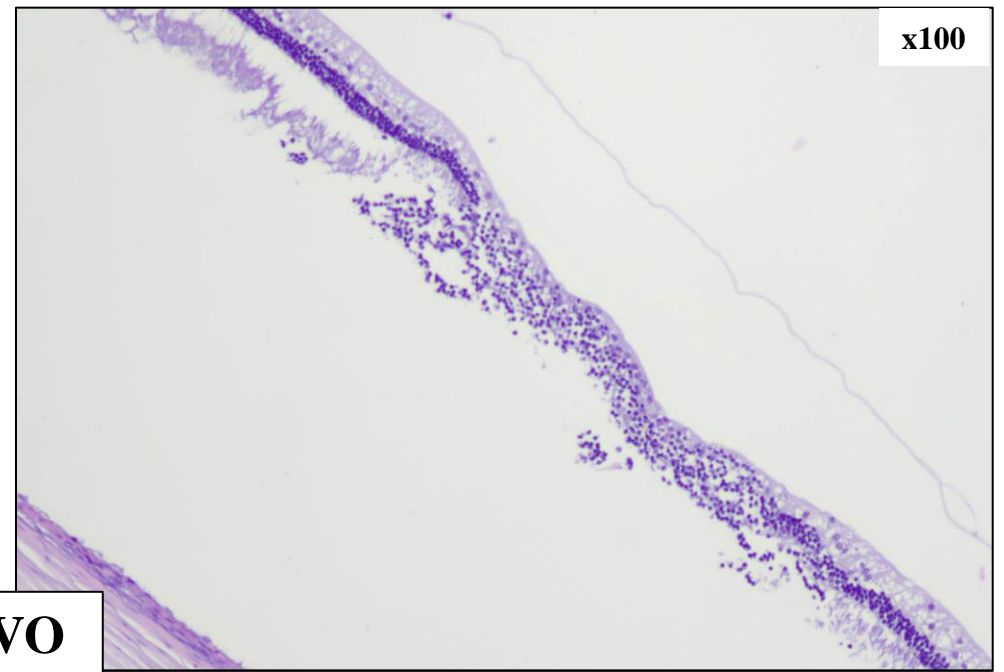

**RVO**

**B**

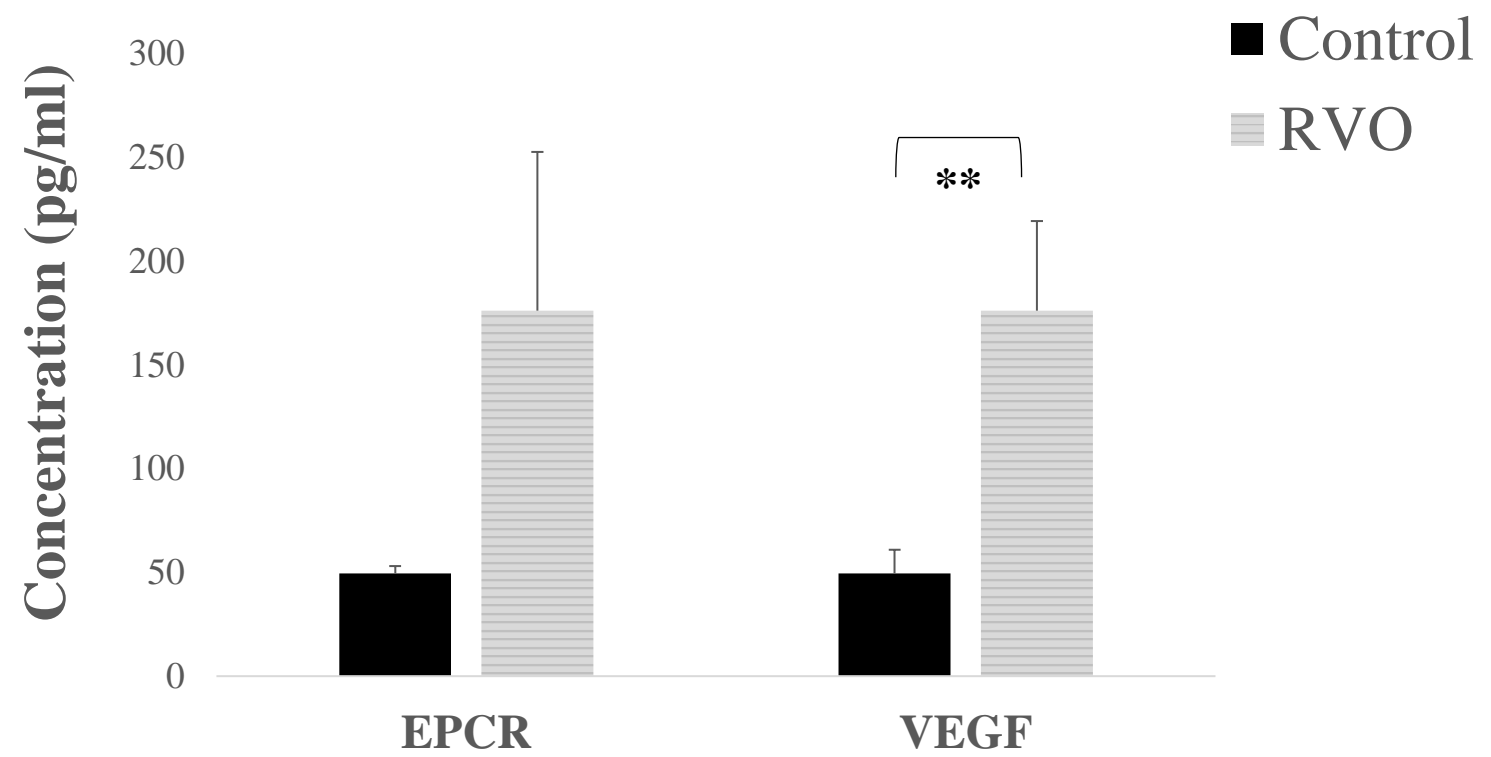

Supplement: f1 [file 2760147.f1.pdf]
